# Supplementary material for: Quantifying the decay timescale of volcanic sulfur dioxide in the stratosphere
Source: Copernicus journal article supplement (doi:10.5194/acp-25-11535-2025), 2025-09-29
Supplement: Supplementary file 1 [file acp-25-11535-2025-supplement.pdf]

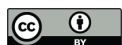

*Supplement of*

## **Quantifying the decay timescale of volcanic sulfur dioxide in the stratosphere**

**Paul A. Nicknish et al.**

*Correspondence to:* Paul A. Nicknish ([nicknish@mit.edu](mailto:nicknish@mit.edu))

The copyright of individual parts of the supplement might differ from the article licence.

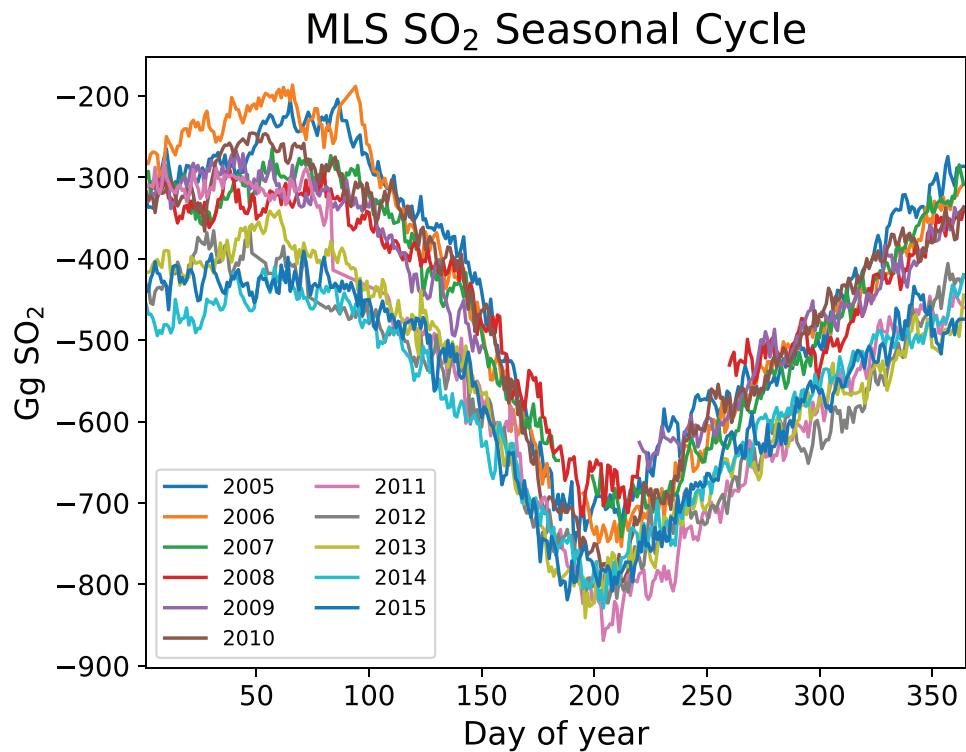

Figure S1: MLS SO<sub>2</sub> seasonal cycle with large volcanic eruption perturbations removed in the 10 km to 14 km height band from 40°N to 90°N.

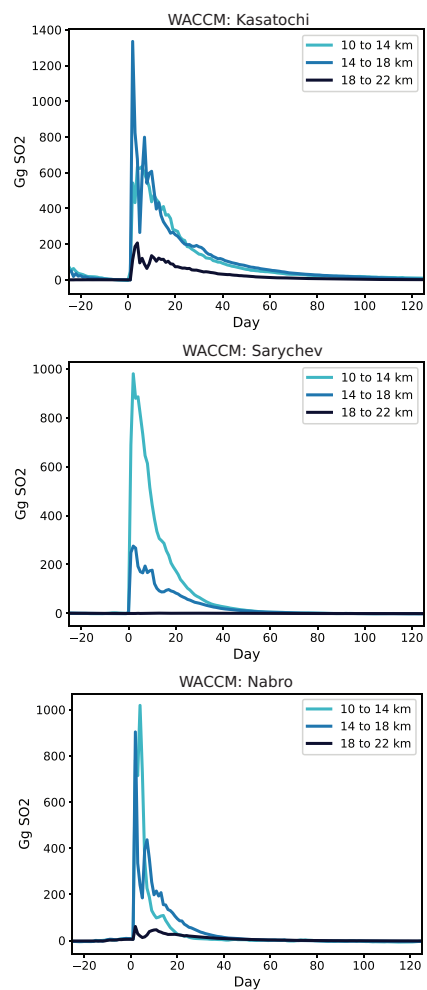

Figure S2: Volcanic SO<sub>2</sub> perturbation for Kasatochi 2008, Sarychev 2009, and Nabro 2011 in the WACCM model. SO<sub>2</sub> masses are split into three height bins: 10 to 14 km, 14 to 18 km, and 18 to 22 km.
